# Supplementary material
Source: ML conference proceedings conference paper supplement (https://openaccess.thecvf.com/content/CVPR2024/html/Bolanos_Gaussian_Shadow_Casting_CVPR_2024_paper.html)
Supplement: Supplementary file 2 [file Bolanos_Gaussian_Shadow_Casting_CVPR_2024_supplemental.zip]

Archive with 2 entries (2 files):
- 5768_supp/CVPR_2024_Gaussian_Shadow_Casting_Supp.pdf
- 5768_supp/Supplementary_Video.mp4
